Niimi Y, Morita S: Plasma concentration of fentanyl with xenon to block somatic and hemodynamic responses to surgical incision. *ANESTHESIOLOGY* 2000; 92:1043-8

61. Lachmann B, Armbruster S, Schairer W, Landstra M, Trouwborst A, Van Daal GJ, Kusuma A, Erdmann W: Safety and efficacy of xenon in routine use as an inhalational anaesthetic. *Lancet* 1990; 335:1413-5

62. Antognini JF, Schwartz K: Exaggerated anesthetic requirements in the preferentially anesthetized brain. *ANESTHESIOLOGY* 1993; 79:1244-9

63. Rampil IJ: Anesthetic potency is not altered after hypothermic spinal cord transection in rats. *ANESTHESIOLOGY* 1994; 80:606-10

64. Rampil IJ, King BS: Volatile anesthetics depress spinal motor neurons. *ANESTHESIOLOGY* 1996; 85:129-34

65. Antognini JF, Carstens E, Atherley R: Does the immobilizing effect of thiopental in brain exceed that of halothane? *ANESTHESIOLOGY* 2002; 96:980-6

66. Sonner JM, Antognini JF, Dutton RC, Flood P, Gray AT, Harris RA, Homanics GE, Kendig J, Orser B, Raines DE, Rampil IJ, Trudell J, Vissel B, Eger EI: Inhaled anesthetics and immobility: Mechanisms, mysteries, and minimum alveolar anesthetic concentration. *Anesth Analg* 2003; 97:718-40

67. Kim J, Yao A, Atherley R, Carstens E, Jinks SL, Antognini JF: Neurons in the ventral spinal cord are more depressed by isoflurane, halothane, and propofol than are neurons in the dorsal spinal cord. *Anesth Analg* 2007; 105:1020-6

68. Antognini JF, Carstens E: Increasing isoflurane from 0.9 to 1.1 minimum alveolar concentration minimally affects dorsal horn cell responses to noxious stimulation. *ANESTHESIOLOGY* 1999; 90:208-14

69. Mitsuyo T, Dutton RC, Antognini JF, Carstens E: The differential effects of halothane and isoflurane on windup of dorsal horn neurons selected in unanesthetized decerebrated rats. *Anesth Analg* 2006; 103:753-60

## ANESTHESIOLOGY REFLECTIONS

### Sertürner Crystallizes Morphine

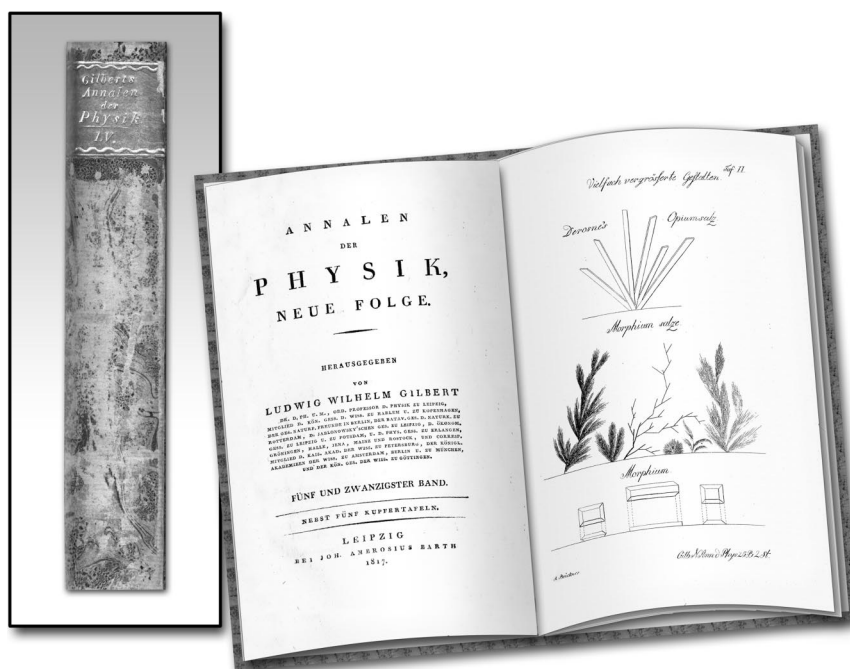

Initially practicing pharmacy near his birthplace, outside Paderborn, Germany, Friedrich Wilhelm Adam Sertürner (1783–1841) first isolated morphine from a poppy's raw opium in 1803. After he and three of his friends had each ingested an astonishing total of 90 mg of morphine (in three divided doses) over 45 minutes, Sertürner had to induce vomiting for the ensuing abdominal pains and sleepiness. Sadly, fellow scientists ignored this “sleeping agent” reported by Sertürner in a letter published by a pharmacy journal in 1805. Sertürner then moved to Einbeck to practice at a second pharmacy and persevere with his groundbreaking alkaloidal research. In 1817 in Gilbert's *Annalen der Physik* (pictured above, courtesy of the Wood Library-Museum), Sertürner presented the world with the “crystallizable” isolate of opium that he had aptly named “morphine,” after Morpheus, the ancient Greek god of dreams. (Copyright © the American Society of Anesthesiologists, Inc. This image appears in color in the *Anesthesiology Reflections* online collection available at [www.anesthesiology.org](http://www.anesthesiology.org).)

George S. Bause, M.D., M.P.H., Honorary Curator, ASA's Wood Library-Museum of Anesthesiology, Park Ridge, Illinois, and Clinical Associate Professor, Case Western Reserve University, Cleveland, Ohio. [UJYC@aol.com](mailto:UJYC@aol.com).
